# Supplementary material
Source: bioRxiv or medRxiv preprint supplement (https://www.biorxiv.org/highwire/filestream/68438/field_highwire_adjunct_files/0/211771-1.pdf)
Supplement: Supplementary file [file 211771-1.pdf]

**Supplemental Materials for:**

**Chromosomal inversions facilitate the accumulation of divergence and hybrid incompatibilities between species**

Fuller Z.L.<sup>1,2\*</sup>, Leonard, C.J.<sup>3\*</sup>, Young, R.E.<sup>3,4</sup>, Schaeffer, S.W.<sup>1</sup>, & Phadnis, N<sup>3\*\*</sup>.

\* these authors contributed equally

<sup>1</sup> Department of Biology, 208 Erwin W. Mueller Laboratories, The Pennsylvania State University, University Park, PA 16802.

<sup>2</sup> Current address: 606 Fairchild Center, Department of Biological Sciences, Columbia University, New York, NY 10027

<sup>3</sup> Department of Biology, University of Utah, Salt Lake City, UT 84112.

<sup>4</sup> Current address: Department of Genetics, University of Wisconsin, Madison, WI 53706.

\*\* address correspondence to:

Nitin Phadnis, 257 South 1400 East, Department of Biology, University of Utah, Salt Lake City, UT 84112; tel: (801)585-0493 email: [nitin.phadnis@utah.edu](mailto:nitin.phadnis@utah.edu)

**This PDF includes:**

Supplemental Methods, Supplemental Figures 1-4, Supplemental Tables 1-2

## SUPPLEMENTARY METHODS

### **Testing for Introgression:**

To test for significant regions of introgression we used the modified  $f$ -statistic ( $f_d$ ), which has been demonstrated to outperform other similar metrics (such as Patterson's  $D$ ) in identifying specific introgressed loci (1). We assumed a true species tree of  $((P_1, P_2) P_3)$  and ancestral outgroup  $O$ , with the two *D. persimilis* arrangements as the sister taxa, *D. pseudoobscura* as  $P_3$  and *D. miranda* as  $O$ . The difference between proportions of discordant topologies at  $n$  sites can be summarized as:

$$S(P_1, P_2, P_3, P_4) = \sum_{i=1}^n [(1 - \hat{p}_{i1})\hat{p}_{i2}\hat{p}_{i3}(1 - \hat{p}_{i4}) - \hat{p}_{i1}(1 - \hat{p}_{i2})\hat{p}_{i3}(1 - \hat{p}_{i4})]$$

where  $P_1, P_2, P_3, P_4$  indicate the four taxa used in the test and  $\hat{p}_{ij}$  is the frequency of derived allele at site  $i$  in population  $j$ . To test for gene flow between lineages  $P_3$  and  $P_2$ , the statistic  $f_d$  given by:

$$\hat{f}_d = \frac{S(P_1, P_2, P_3, O)}{S(P_1, P_D, P_D, O)}$$

where  $P_D$  is either  $P_2, P_3$  depending on which has the higher frequency of the derived allele. The standard error can then be estimated using a weighted leave-one-out block jackknife procedure (2, 3). We used the R package "bootstrap" and a block size of 500 kb to perform the jackknife resampling.

We estimated  $f_d$  in 50 kb windows across the genome and performed a two-tailed z-test at each locus to determine if a value was significantly different from 0. The significance was adjusted for multiple testing using the Benjamini-Hochberg approach (4) at a false discovery rate (FDR) of 0.01. The resulting significance threshold was  $P < 0.001632$  and  $|f_d| > 0.243248$ . We do not find evidence for the proportion of missing data in a given window having an effect on the value of  $f_d$  estimated. In no sample is the mean proportion of missing data in windows with evidence for introgression significantly different than the mean proportion of missing data for windows showing no evidence for introgression (analyzed with Wilcoxon rank-sum test).

### **Phylogenetic Analysis and Tests for Introgression Using Polymorphic Third Chromosome Inversions of *D. pseudoobscura***

In both species the third chromosome is highly polymorphic for a series of inversions, including one that is shared between them, referred to as the "standard" arrangement (5, 6). The wild-caught samples included in our study carry unknown third chromosome arrangements, however the reference strains of *D. pseudoobscura* and *D. persimilis* carry the "arrowhead" (AR) and standard arrangements respectively (7). In order to test if the phylogenetic pattern and significant evidence of introgression observed surrounding the SR breakpoints are simply an artifact of polymorphic inversions that are shared among species, we performed a similar analysis using the *D. persimilis* reference sequence and known *D. pseudoobscura* arrangements.

To date, the *D. persimilis* reference strain MSH-3 has not been resequenced and the original reads used for the genome assembly available from the NCBI Trace Archive were generated

from Sanger sequencing. As a result, reads from MSH-3 could not be aligned to the *D. pseudoobscura* reference sequence using the same bioinformatics pipeline as the samples included in our study. Instead, we aligned *D. pseudoobscura* reads to the *D. persimilis* reference genome and called SNPs with the same method used to generate variants in our original analysis. For the *D. pseudoobscura* sequences, we obtained reads (Accession Number: PRJNA358242) of 14 lines carrying the AR arrangement and 8 lines carrying the standard arrangement that were each made homozygous for the third chromosome. Similar to the X chromosome and chromosome 4 of the *D. pseudoobscura* reference assembly, the reference of chromosome 3 for *D. persimilis* is distributed among 9 large scaffolds. Using the map determined by Schaeffer et al. (2008), we converted the scaffold specific coordinates to their appropriate location on the third chromosome to construct a continuous sequence. Furthermore, the location and coordinates of the breakpoints for the ST/AR inversion have previously been determined for the *D. persimilis* reference assembly (19). We then performed a similar test for discordant phylogenies in 10 kb windows across the third chromosome (Figure S3).

Similarly, we tested for significant excesses of particular discordant phylogenies indicative of introgression using  $f_d$ . We assumed the species phylogeny to follow the form of  $((P_1, P_2) P_3), O$  where  $P_1$  and  $P_2$  correspond to the polymorphic *D. pseudoobscura* arrangements,  $P_3$  is the standard arrangement of *D. persimilis* and  $O$  is the outgroup *D. miranda*. Unlike with the pattern observed on XR, we did not find evidence of any regions with a  $f_d$  value significantly different from 0. Although a small number of discordant phylogenies are detected within the AR inversion, it does not appear there are significant excesses of any topology to suggest introgression.

### **Estimates of the polymorphic 3<sup>rd</sup> chromosome inversions of *D. pseudoobscura*.**

In *D. pseudoobscura*, the Arrowhead ( $3^{AR}$ ) and Pikes Peak ( $3^{PP}$ ) arrangements are both derived from  $3^{ST}$ , although  $3^{AR}$  is estimated to be one of the younger arrangements and  $3^{PP}$  is relatively old (9). To confirm the relative timeline of the origin of these inversions and to clarify the evolutionary history of the arrangements in the ancestral population, we further estimated divergence between the *D. pseudoobscura*  $3^{ST}$  and derived polymorphic  $3^{AR}$  and  $3^{PP}$  3<sup>rd</sup> chromosome inversions. Indeed, after standardizing the estimates of  $d_{xy}$  to the speciation time with *D. miranda*, we estimate that  $3^{AR}$  is the youngest arrangement having diverged from *D. pseudoobscura*  $3^{ST}$  approximately 418 Kya. Furthermore,  $3^{PP}$  appears to be older, diverging from  $3^{ST}$  ~750 Kya and before the species split between *D. pseudoobscura* and *D. persimilis* (Table 1). These results suggest that  $3^{PP}$  was segregating as a polymorphic inversion in the ancestral species and was transmitted exclusively to *D. pseudoobscura* while the inversions on XL and the 2<sup>nd</sup> chromosome were inherited by the *D. persimilis* lineage (Figure 4).

## SUPPLEMENTARY FIGURES

**Supplemental Figure 1:** Polytene squash of a *D. persimilis* ST/SR female heterozygote. The XR chromosome contains a single inversion as observed by a characteristic inversion loop. The remainder of the genome is homosequential.

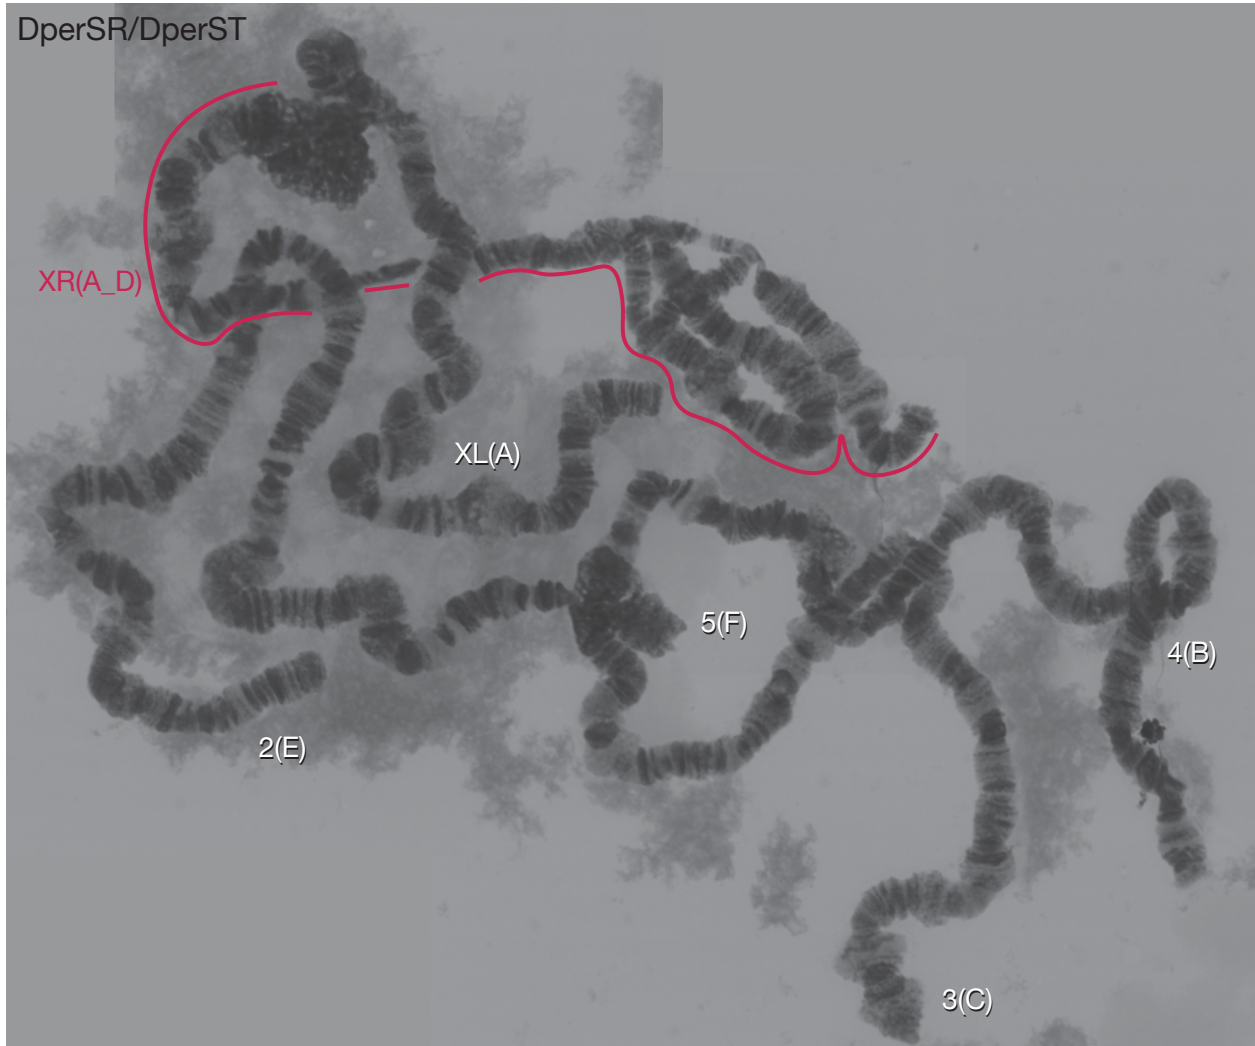



**Supplemental Figure 2:** PCR amplification of the proximal breakpoint. Genomic template from *D. pseudoobscura* and *D. persimilis* SR, but not *D. persimilis* ST, generated an approximately 1.5kb amplicon of the proximal breakpoint with primers specific for the ancestral orientation of the XR chromosome.

**A**

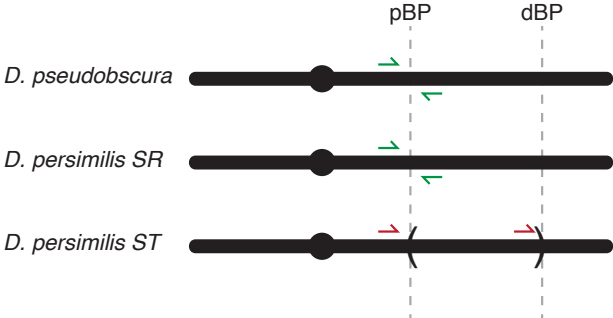

**B**

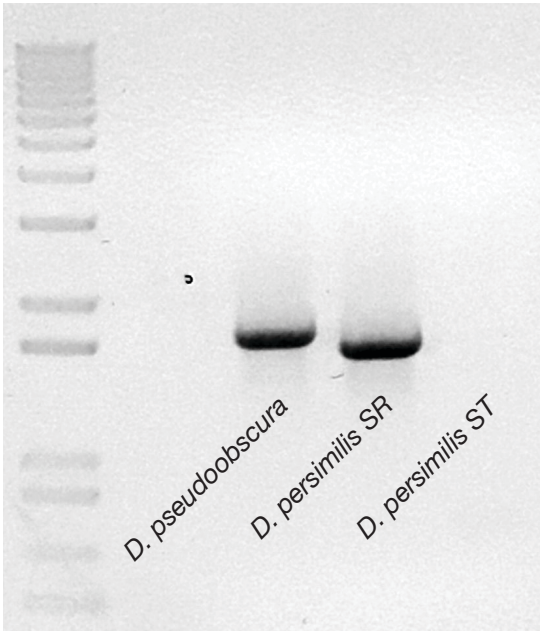

**Supplemental Figure 3:** Species clustering within inversion polymorphisms on chromosome 3. The *D. pseudoobscura* 3<sup>rd</sup> chromosome arrangements Standard (ST) and Arrowhead (AR) lack the large breakpoint-specific phylogenetic discordance observed at the inversion break points of the inversion between *D. pseudoobscura* and *D. persimilis* SR on chromosome XR. While some windows demonstrate phylogenetic discordance, these windows are independent of the arrangement of the chromosome forms and, unlike the XR inversion, do not cluster at the inversion breakpoints.

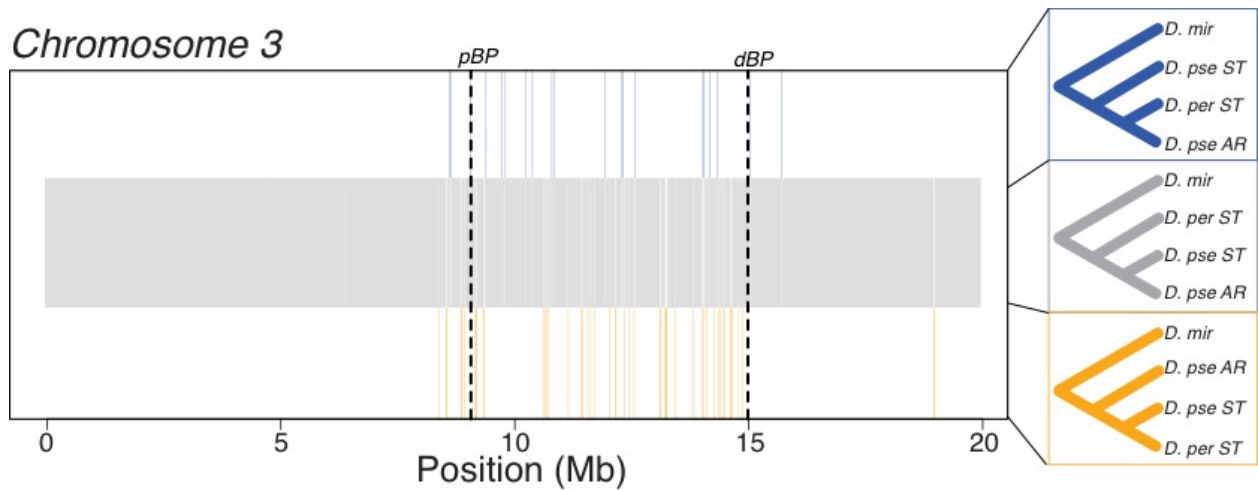

**Supplemental Figure 4:** Significant  $f_d$  signature at phylogenetically discordant breakpoints. (A) We observe large regions with significant  $f_d$  at both of the inversion breakpoints on the XR chromosome. (B) In contrast, we observe fewer and less concentrated windows with significant  $f_d$  through the remainder of the genome.

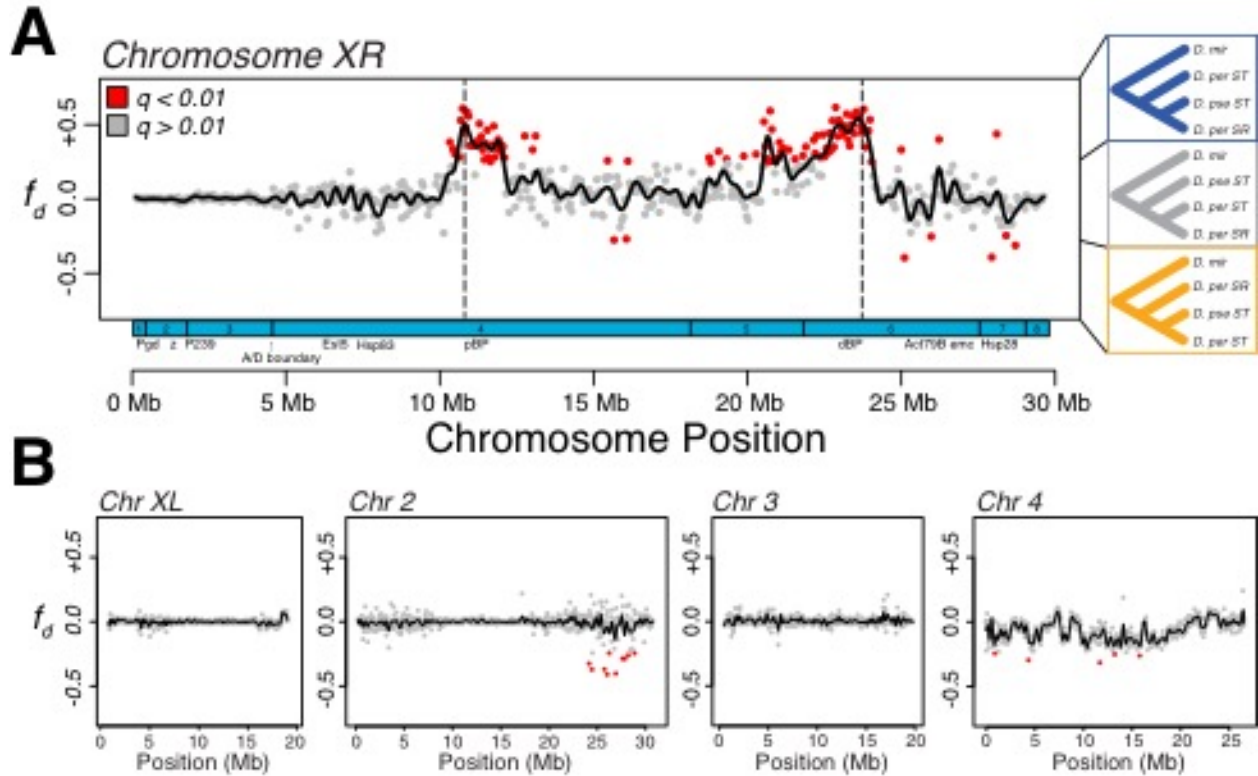

**Supplemental Table 1: *D. pseudoobscura* reference alignment statistics**

| <b>Statistic</b>                                               | <b><i>D. pse ST</i></b> | <b><i>D. per ST</i></b> | <b><i>D. per SR</i></b> | <b><i>D. mir</i></b> |
|----------------------------------------------------------------|-------------------------|-------------------------|-------------------------|----------------------|
| <i>Total Reads</i>                                             | 139337556               | 242743626               | 215111160               | 49649299             |
| <i>Mapped Reads</i>                                            | 133512488               | 223244577               | 165073083               | 45556023             |
| <i>% Mapped</i>                                                | 95.82                   | 91.97                   | 76.74                   | 91.53                |
| <i>Mean Coverage</i>                                           | 82.72                   | 180.28                  | 133.37                  | 22.19                |
| <i>St. Dev. Coverage</i>                                       | 236.03                  | 666.46                  | 538.60                  | 60.15                |
| <i>% Reference Bases Covered<br/>(QUAL &gt; 30, DP &gt; 2)</i> | 96.49                   | 95.48                   | 95.45                   | 89.77                |

**Supplemental Table 2: *D. pseudoobscura* reference alignment statistics for each sample across all scaffolds**

| Scaffold                          | Mean Coverage | Length   | % Covered | Covered (bp) | + Reads  | - Reads  | Read GC | Median Coverage | St. Dev. Coverage |
|-----------------------------------|---------------|----------|-----------|--------------|----------|----------|---------|-----------------|-------------------|
| <b><i>D. pseudoobscura ST</i></b> |               |          |           |              |          |          |         |                 |                   |
| 2                                 | 83.9129       | 30819483 | 97.5788   | 30073269     | 13841040 | 13841340 | 0.4403  | 85              | 40.51             |
| 3                                 | 85.9616       | 19787792 | 97.5288   | 19298803     | 9058245  | 9057166  | 0.4549  | 86              | 62.53             |
| XL_group3a                        | 44.7765       | 2692213  | 96.4761   | 2597342      | 642496   | 643846   | 0.4455  | 43              | 67.92             |
| XL_group3b                        | 54.3022       | 388551   | 98.341    | 382105       | 112865   | 113304   | 0.4266  | 45              | 122.17            |
| XL_group1e                        | 42.4095       | 12541198 | 97.8198   | 12267770     | 2878802  | 2874461  | 0.4426  | 42              | 26.38             |
| XL_group1a                        | 45.7357       | 9148293  | 96.8705   | 8861993      | 2257478  | 2255726  | 0.4523  | 42              | 81.27             |
| XR_group3a                        | 40.5871       | 1469181  | 97.7692   | 1436406      | 324078   | 324013   | 0.4676  | 40              | 16.46             |
| XR_group8                         | 41.4123       | 9197557  | 97.3256   | 8951575      | 2056823  | 2057328  | 0.4571  | 41              | 20.03             |
| XR_group6                         | 42.6727       | 13333775 | 97.5782   | 13010864     | 3061992  | 3063993  | 0.4477  | 42              | 34.97             |
| XR_group5                         | 51.3656       | 740970   | 98.7634   | 731807       | 203154   | 203069   | 0.4408  | 44              | 49.9              |
| 4_group1                          | 84.4553       | 5287126  | 98.1752   | 5190646      | 2402053  | 2400617  | 0.418   | 84              | 201.76            |
| 4_group2                          | 81.5053       | 1235759  | 94.4519   | 1167198      | 534344   | 533721   | 0.4381  | 85              | 62.7              |
| 4_group5                          | 80.7469       | 2439919  | 93.5238   | 2281905      | 1054607  | 1055036  | 0.4205  | 86              | 36.3              |
| 4_group3                          | 83.7848       | 11685562 | 97.9635   | 11447582     | 5288757  | 5290633  | 0.438   | 84              | 38.18             |
| 4_group4                          | 85.1283       | 6594820  | 96.8235   | 6385336      | 3016316  | 3013210  | 0.4307  | 86              | 58.84             |
| <b><i>D. persimilis ST</i></b>    |               |          |           |              |          |          |         |                 |                   |
| 2                                 | 164.977       | 30819483 | 97.0029   | 29895789     | 21218521 | 21207288 | 0.4407  | 167             | 188.31            |
| 3                                 | 172.5389      | 19787792 | 97.2785   | 19249261     | 14029962 | 14051884 | 0.4562  | 168             | 315.05            |
| XL_group3a                        | 98.7035       | 2692213  | 95.3536   | 2567123      | 1111653  | 1129452  | 0.4454  | 84              | 516.14            |
| XL_group3b                        | 127.3868      | 388551   | 96.5912   | 375306       | 205046   | 214191   | 0.428   | 87              | 646.91            |
| XL_group1e                        | 81.7047       | 12541198 | 96.4054   | 12090397     | 4416728  | 4410151  | 0.4437  | 81              | 101.25            |
| XL_group1a                        | 90.2694       | 9148293  | 95.7352   | 8758133      | 3551556  | 3546460  | 0.4523  | 81              | 236.71            |
| XR_group3a                        | 79.19         | 1469181  | 97.3737   | 1430596      | 486513   | 484643   | 0.4699  | 79              | 41.59             |
| XR_group8                         | 89.5757       | 9197557  | 96.9735   | 8919190      | 3458016  | 3455692  | 0.4542  | 80              | 325.56            |
| XR_group6                         | 85.1736       | 13333775 | 97.1807   | 12957860     | 4747154  | 4758411  | 0.4501  | 82              | 175.54            |
| XR_group5                         | 130.6743      | 740970   | 98.2654   | 728117       | 414469   | 400653   | 0.4468  | 86              | 578.93            |
| 4_group1                          | 163.9504      | 5287126  | 98.0539   | 5184232      | 3610240  | 3612560  | 0.4204  | 167             | 214.27            |
| 4_group2                          | 157.7765      | 1235759  | 94.0514   | 1162249      | 803902   | 801984   | 0.4409  | 165             | 130.01            |
| 4_group5                          | 162.3184      | 2439919  | 93.3079   | 2276636      | 1642333  | 1646317  | 0.421   | 170             | 153.35            |
| 4_group3                          | 167.8842      | 11685562 | 97.8139   | 11430105     | 8157166  | 8208579  | 0.4386  | 167             | 264.92            |
| 4_group4                          | 174.5058      | 6594820  | 96.5778   | 6369135      | 4817701  | 4797167  | 0.4293  | 169             | 372.64            |
| <b><i>D. persimilis SR</i></b>    |               |          |           |              |          |          |         |                 |                   |
| 2                                 | 123.8174      | 30819483 | 97.066    | 29915249     | 15929350 | 15921833 | 0.4405  | 126             | 121.34            |
| 3                                 | 129.4046      | 19787792 | 97.3175   | 19256975     | 10524186 | 10542187 | 0.4561  | 126             | 200.77            |
| XL_group3a                        | 72.644        | 2692213  | 95.3993   | 2568353      | 819835   | 830492   | 0.4458  | 63              | 327.77            |
| XL_group3b                        | 91.683        | 388551   | 96.5912   | 375306       | 147636   | 153787   | 0.4273  | 65              | 411.43            |
| XL_group1e                        | 61.6822       | 12541198 | 96.4177   | 12091940     | 3337286  | 3330588  | 0.4433  | 61              | 71.76             |
| XL_group1a                        | 67.3117       | 9148293  | 95.7067   | 8755531      | 2650164  | 2642849  | 0.4521  | 61              | 156.07            |
| XR_group3a                        | 59.0851       | 1469181  | 97.0172   | 1425359      | 363124   | 361638   | 0.4681  | 60              | 26.84             |
| XR_group8                         | 67.4893       | 9197557  | 96.7935   | 8902635      | 2596009  | 2598475  | 0.4536  | 61              | 202.92            |
| XR_group6                         | 65.3798       | 13333775 | 96.9487   | 12926920     | 3641958  | 3650285  | 0.4502  | 62              | 125.81            |
| XR_group5                         | 108.0875      | 740970   | 98.2692   | 728145       | 341682   | 333001   | 0.4491  | 65              | 654.37            |
| 4_group1                          | 122.9093      | 5287126  | 97.9889   | 5180798      | 2708350  | 2709811  | 0.4199  | 125             | 137.14            |
| 4_group2                          | 121.8041      | 1235759  | 94.0568   | 1162315      | 619405   | 619577   | 0.4406  | 123             | 125.59            |
| 4_group5                          | 122.0682      | 2439919  | 93.2785   | 2275919      | 1236125  | 1239514  | 0.4207  | 128             | 101.35            |
| 4_group3                          | 125.9379      | 11685562 | 97.7793   | 11426058     | 6126711  | 6157243  | 0.4382  | 126             | 160.42            |
| 4_group4                          | 130.2957      | 6594820  | 96.5311   | 6366054      | 3600688  | 3581896  | 0.4292  | 127             | 228.23            |
| <b><i>D. miranda</i></b>          |               |          |           |              |          |          |         |                 |                   |
| 2                                 | 18.7027       | 30819483 | 93.6237   | 28854340     | 4027647  | 4027315  | 0.4583  | 18              | 18.38             |
| 3                                 | 20.1168       | 19787792 | 94.4606   | 18691673     | 2779677  | 2785477  | 0.4691  | 19              | 26.53             |
| XL_group3a                        | 19.4302       | 2692213  | 92.6627   | 2494677      | 368119   | 368015   | 0.4623  | 18              | 32.81             |
| XL_group3b                        | 29.0281       | 388551   | 91.2452   | 354534       | 79627    | 79773    | 0.4578  | 19              | 47.92             |
| XL_group1e                        | 17.8448       | 12541198 | 92.6182   | 11615438     | 1585445  | 1585920  | 0.4625  | 17              | 21.8              |
| XL_group1a                        | 19.6939       | 9148293  | 91.9186   | 8408982      | 1275755  | 1276178  | 0.4701  | 18              | 44.68             |
| XR_group3a                        | 19.3349       | 1469181  | 93.2392   | 1369852      | 201744   | 200722   | 0.481   | 17              | 69.58             |
| XR_group8                         | 17.3782       | 9197557  | 94.1218   | 8656902      | 1121618  | 1119342  | 0.4722  | 17              | 11.37             |
| XR_group6                         | 18.1368       | 13333775 | 94.4924   | 12599410     | 1690148  | 1689856  | 0.4622  | 18              | 24.69             |
| XR_group5                         | 20.3789       | 740970   | 94.8644   | 702917       | 105668   | 105158   | 0.4537  | 19              | 21.71             |
| 4_group1                          | 16.3376       | 5287126  | 90.9867   | 4810580      | 609460   | 610129   | 0.4451  | 16              | 16.38             |
| 4_group2                          | 18.8393       | 1235759  | 89.9682   | 1111790      | 162242   | 162151   | 0.4547  | 18              | 20.14             |
| 4_group5                          | 16.2932       | 2439919  | 88.1169   | 2149982      | 279051   | 278681   | 0.444   | 17              | 14.46             |
| 4_group3                          | 17.8253       | 11685562 | 93.7048   | 10949928     | 1461704  | 1460165  | 0.4556  | 17              | 23.03             |
| 4_group4                          | 17.2507       | 6594820  | 89.696    | 5915288      | 802786   | 803197   | 0.4491  | 17              | 22.14             |

### Supplemental References:

1. Martin SH, Davey JW, Jiggins CD (2014) Evaluating the Use of ABBA–BABA Statistics to Locate Introgressed Loci. *Mol Biol Evol*:msu269.
2. Durand EY, Patterson N, Reich D, Slatkin M (2011) Testing for Ancient Admixture between Closely Related Populations. *Mol Biol Evol* 28(8):2239–2252.
3. Schaefer NK, Shapiro B, Green RE (2016) Detecting hybridization using ancient DNA. *Mol Ecol* 25(11):2398–2412.
4. Benjamini Y, Hochberg Y (1995) Controlling the False Discovery Rate: A Practical and Powerful Approach to Multiple Testing. *Journal of the Royal Statistical Society Series B (Methodological)* 57(1):289–300.
5. Schaeffer SW, et al. (2003) Evolutionary genomics of inversions in *Drosophila pseudoobscura*: Evidence for epistasis. *Proc Natl Acad Sci U S A* 100(14):8319–8324.
6. Dobzhansky TG, Epling CC (1944) *Contributions to the Genetics, Taxonomy, and Ecology of Drosophila Pseudoobscura and Its Relatives. Th. Dobzhansky and Carl Epling. - Washington 1944. 8°* (Carnegie Institution of Washington).
7. Richards S, et al. (2005) Comparative genome sequencing of *Drosophila pseudoobscura*: Chromosomal, gene, and cis-element evolution. *Genome Res* 15(1):1–18.
8. Schaeffer SW, et al. (2008) Polytene Chromosomal Maps of 11 *Drosophila* Species: The Order of Genomic Scaffolds Inferred From Genetic and Physical Maps. *Genetics* 179(3):1601–1655.
9. Wallace AG, Detweiler D, Schaeffer SW (2011) Evolutionary History of the Third Chromosome Gene Arrangements of *Drosophila pseudoobscura* Inferred from Inversion Breakpoints. *Mol Biol Evol* 28(8):2219–2229.
